# Supplementary material for: The avian lung mycobiome: phylogenetic and ecological drivers of lung-fungal communities and their potential pathogens
Source: Research Square preprint supplement (doi:10.21203/rs.3.rs-5214380/v1), 2024-10-14
Supplement: Supplementary file 1 [file 783bede403a4562bc550d837.xlsx]

## Sheet: Sheet1
Table 1. Fungal taxa from 300 avian lung cultures. Contigs are clustered at 97% similarity.
Phylum	Class	Order	Genus	Species	Number of cultures	Number of birds
Ascomycota	Dothideomycetes	Pleosporales	Alternaria	A. alternata	14	13 (7.9%)
				A. malorum	1	1 (0.6%)
			Ascochyta	A. medicaginicola	1	1 (0.6%)
			Curvularia	Curvularia sp.	2	2 (1.2%)
			Didymella	Didymella sp.	5	5 (3.0%)
			Neocamarosporium	N. betae	1	1 (0.6%)
			Tamaricicola	Tamaricicola sp.	2	2 (1.2%)
			unclassified	unclassified	1	1 (0.6%)
		Cladosporiales	Cladosporium	Cladosporium sp.	32	27 (16.5%)
		Dothideales	Aureobasidium	Aureobasidium sp.	3	3 (1.8%)
		Incertae sedis	Coniosporium	Coniosporium sp.	1	1 (0.6%)
		unclassified	unclassified	unclassified	1	1 (0.6%)
	Eurotiomycetes	Chaetothyriales	Rhinocladiella	Rhinocladiella sp.	3	2 (1.2%)
		Eurotiales	Aspergillus	A. fumigatus	16	11 (6.7%)
				A. nidulans	1	1 (0.6%)
				A. niger	12	8 (4.9%)
				A. niveus	1	1 (0.6%)
				A. terreus	4	2 (1.2%)
				Aspergillus sp. 1	3	3 (1.8%)
				Aspergillus sp. 2	1	1 (0.6%)
			Penicillium	P. decumbens	1	1 (0.6%)
				P. minioluteus	1	1 (0.6%)
				Penicillium sp. 1	8	8 (4.9%)
				Penicillium sp. 2	13	12 (7.3%)
				Penicillium sp. 3	1	1 (0.6%)
				Penicillium sp. 4	1	1 (0.6%)
				Penicillium sp. 5	1	1 (0.6%)
				Penicillium sp. 6	8	5 (3.0%)
				Penicillium sp. 7	45	39 (23.8%)
		Onygenales	Malbranchea	M. albolutea	1	1 (0.6%)
	Saccharomycetes	Saccharomycetales	Meyerozyma (Candida)	M. guilliermondii species concept	4	4 (2.4%)
	Sordariomycetes	Hypocreales	Beauveria	B. bassiana	5	4 (2.4%)
			Fusarium	FFSC sp. 1	23	18 (11.0%)
				FFSC sp. 2	14	12 (7.3%)
				FIESC	2	2 (1.2%)
		Microascales	Microascus	M. cirrosus	1	1 (0.6%)
		Myrmecridiales	Myrmecridium	M. schulzeri	1	1 (0.6%)
		Sordariales	Chaetomium	C. globosum	1	1 (0.6%)
			Neurospora	N. discreta	2	2 (1.2%)
			Parachaetomium	Parachaetomium sp.	1	1 (0.6%)
Basidiomycota	Microbotryomycetes	Sporidiobolales	Rhodotorula	R. glutinis	1	1 (0.6%)
	Tremellomycetes	Filobasidiales	Filobasidium (Cryptococcus)	F. magnum	6	6 (3.7%)
		Tremellales	Papiliotrema	P. flavescens	1	1 (0.6%)
Mucoromycota	Mucoromycetes	Mucorales	Lichtheimia	L. corymbifera	1	1 (0.6%)
				L. ramosa	2	2 (1.2%)
			Mucor	M. irregularis	1	1 (0.6%)
				M. circinelloides	3	3 (1.8%)
			Rhizopus	R. arrhizus	46	45 (27.4%)
